# Supplementary material for: Combined numerical and experimental study of microstructure andpermeability in porous granular media
Source: Copernicus journal article supplement (doi:10.5194/se-2019-199), 2020-01-02
Supplement: Supplementary file 1 [file se-2019-199-supplement.pdf]

Table 1: Table presenting all computed parameters for each subsample of full sample 02.

| Sample name | $x_{start}$ | $y_{start}$ | $z_{start}$ | Resolution  | $\phi_{tot}$ | $\phi_{eff}$ | $S_{tot}$ | $S_{eff}$ | $\tilde{\tau}_h$ | $k_{num}$                |
|-------------|-------------|-------------|-------------|-------------|--------------|--------------|-----------|-----------|------------------|--------------------------|
| Ex02Sub01   | 260         | 300         | 250         | 512x512x512 | 0.2058       | 0.2058       | 0.0027    | 0.0027    | 2.7974           | $1.3285 \times 10^{-10}$ |
| Ex02Sub02   | 500         | 300         | 250         | 512x512x512 | 0.2244       | 0.2244       | 0.0026    | 0.0026    | 2.7637           | $2.3722 \times 10^{-10}$ |
| Ex02Sub03   | 260         | 480         | 250         | 512x512x512 | 0.2196       | 0.2196       | 0.0027    | 0.0027    | 2.7806           | $1.5939 \times 10^{-10}$ |
| Ex02Sub04   | 500         | 480         | 250         | 512x512x512 | 0.2229       | 0.2229       | 0.0027    | 0.0027    | 2.9140           | $1.6083 \times 10^{-10}$ |
| Ex02Sub05   | 260         | 300         | 492         | 512x512x512 | 0.1925       | 0.1924       | 0.0025    | 0.0025    | 2.7807           | $1.4017 \times 10^{-10}$ |
| Ex02Sub06   | 500         | 300         | 492         | 512x512x512 | 0.1954       | 0.1953       | 0.0024    | 0.0024    | 2.7434           | $1.6425 \times 10^{-10}$ |
| Ex02Sub07   | 260         | 480         | 492         | 512x512x512 | 0.2108       | 0.2108       | 0.0025    | 0.0025    | 2.9747           | $1.6320 \times 10^{-10}$ |
| Ex02Sub08   | 500         | 480         | 492         | 512x512x512 | 0.1911       | 0.1910       | 0.0024    | 0.0024    | 2.7406           | $1.4882 \times 10^{-10}$ |

$x_{start}$ : Starting point in x-direction in the full sample

$y_{start}$ : Starting point in y-direction in the full sample

$z_{start}$ : Starting point in z-direction in the full sample

$\phi_{tot}$ : Total porosity of the subsample

$\phi_{eff}$ : Effective porosity of the subsample

$S_{tot}$ : Total specific surface of the subsample [ $\mu m^{-1}$ ]

$S_{eff}$ : Effective specific surface of the subsample [ $\mu m^{-1}$ ]

$\tilde{\tau}_h$ : Average hydraulic tortuosity of the subsample

$k_{num}$ : Numerical estimate for the permeability of the subsample [ $m^2$ ]

Table 2: Table presenting all computed parameters for each subsample of full sample 11. Empty cells denote subsample without interconnected pathways.

| Sample name | $x_{start}$ | $y_{start}$ | $z_{start}$ | Resolution  | $\phi_{tot}$ | $\phi_{eff}$ | $S_{tot}$ | $S_{eff}$ | $\tilde{\tau}_h$ | $k_{num}$                |
|-------------|-------------|-------------|-------------|-------------|--------------|--------------|-----------|-----------|------------------|--------------------------|
| Ex11Sub01   | 280         | 190         | 200         | 512x512x512 | 0.041458     | 0.03268      | 0.001167  | 0.000886  | 2.7716           | $2.2256 \times 10^{-13}$ |
| Ex11Sub02   | 470         | 190         | 200         | 512x512x512 | 0.071224     | 0.06746      | 0.001179  | 0.000997  | 2.1095           | $4.3785 \times 10^{-10}$ |
| Ex11Sub03   | 280         | 450         | 200         | 512x512x512 | -            | -            | -         | -         | -                | -                        |
| Ex11Sub04   | 470         | 450         | 200         | 512x512x512 | 0.037491     | 0.020753     | 0.001150  | 0.000604  | 2.5783           | $2.2256 \times 10^{-13}$ |
| Ex11Sub05   | 280         | 190         | 438         | 512x512x512 | 0.045670     | 0.035713     | 0.001211  | 0.00950   | 3.5928           | $4.3251 \times 10^{-13}$ |
| Ex11Sub06   | 470         | 190         | 438         | 512x512x512 | 0.054834     | 0.05215      | 0.001183  | 0.001044  | 2.1776           | $1.1288 \times 10^{-11}$ |
| Ex11Sub07   | 280         | 450         | 438         | 512x512x512 | 0.040818     | 0.023252     | 0.001130  | 0.000612  | 3.0747           | $1.0000 \times 10^{-13}$ |
| Ex11Sub08   | 470         | 450         | 438         | 512x512x512 | 0.038262     | 0.03304      | 0.001107  | 0.00858   | 3.0947           | $3.0000 \times 10^{-13}$ |

$x_{start}$ : Starting point in x-direction in the full sample

$y_{start}$ : Starting point in y-direction in the full sample

$z_{start}$ : Starting point in z-direction in the full sample

$\phi_{tot}$ : Total porosity of the subsample

$\phi_{eff}$ : Effective porosity of the subsample

$S_{tot}$ : Total specific surface of the subsample [ $\mu m^{-1}$ ]

$S_{eff}$ : Effective specific surface of the subsample [ $\mu m^{-1}$ ]

$\tilde{\tau}_h$ : Average hydraulic tortuosity of the subsample

$k_{num}$ : Numerical estimate for the permeability of the subsample [ $m^2$ ]

Table 3: Table presenting all computed parameters for each subsample of full sample 14.

| Sample name | $x_{start}$ | $y_{start}$ | $z_{start}$ | Resolution  | $\phi_{tot}$ | $\phi_{eff}$ | $S_{tot}$ | $S_{eff}$ | $\tilde{\tau}_h$ | $k_{num}$                   |
|-------------|-------------|-------------|-------------|-------------|--------------|--------------|-----------|-----------|------------------|-----------------------------|
| Ex14Sub01   | 200         | 200         | 200         | 512x512x512 | 0.1542       | 0.1540       | 0.0034    | 0.0034    | 2.7813           | $1.0111990 \times 10^{-10}$ |
| Ex14Sub02   | 200         | 200         | 200         | 512x512x512 | 0.1571       | 0.1571       | 0.0034    | 0.0034    | 2.7612           | $1.0443840 \times 10^{-10}$ |
| Ex14Sub03   | 200         | 200         | 200         | 512x512x512 | 0.1448       | 0.1447       | 0.0034    | 0.0034    | 2.8081           | $6.4047690 \times 10^{-11}$ |
| Ex14Sub04   | 200         | 200         | 200         | 512x512x512 | 0.1486       | 0.1470       | 0.0034    | 0.0034    | 2.9281           | $5.9222040 \times 10^{-11}$ |
| Ex14Sub05   | 200         | 200         | 200         | 512x512x512 | 0.1029       | 0.1001       | 0.0027    | 0.0025    | 2.8168           | $4.1996600 \times 10^{-12}$ |
| Ex14Sub06   | 200         | 200         | 200         | 512x512x512 | 0.1194       | 0.1131       | 0.0027    | 0.0025    | 2.8374           | $7.6716540 \times 10^{-12}$ |
| Ex14Sub07   | 200         | 200         | 200         | 512x512x512 | 0.1065       | 0.1059       | 0.0027    | 0.0027    | 3.6978           | $9.6691650 \times 10^{-12}$ |
| Ex14Sub08   | 200         | 200         | 200         | 512x512x512 | 0.1191       | 0.1188       | 0.0029    | 0.0028    | 3.9223           | $9.4282180 \times 10^{-12}$ |

$x_{start}$ : Starting point in x-direction in the full sample

$y_{start}$ : Starting point in y-direction in the full sample

$z_{start}$ : Starting point in z-direction in the full sample

$\phi_{tot}$ : Total porosity of the subsample

$\phi_{eff}$ : Effective porosity of the subsample

$S_{tot}$ : Total specific surface of the subsample [ $\mu m^{-1}$ ]

$S_{eff}$ : Effective specific surface of the subsample [ $\mu m^{-1}$ ]

$\tilde{\tau}_h$ : Average hydraulic tortuosity of the subsample

$k_{num}$ : Numerical estimate for the permeability of the subsample [ $m^2$ ]

Table 4: Table presenting all computed parameters for each subsample of full sample 15. Empty cells denote subsamples without interconnected pathways.

| Sample name | $x_{start}$ | $y_{start}$ | $z_{start}$ | Resolution  | $\phi_{tot}$ | $\phi_{eff}$ | $S_{tot}$ | $S_{eff}$ | $\tilde{\tau}_h$ | $k_{num}$                |
|-------------|-------------|-------------|-------------|-------------|--------------|--------------|-----------|-----------|------------------|--------------------------|
| Ex15Sub01   | 210         | 200         | 200         | 512x512x512 | 0.023587     | 0.012874     | 0.000814  | 0.000392  | 2.9814           | $3.9788 \times 10^{-13}$ |
| Ex15Sub02   | 390         | 200         | 200         | 512x512x512 | 0.023149     | 0.018063     | 0.000833  | 0.000584  | 3.0012           | $8.3110 \times 10^{-13}$ |
| Ex15Sub03   | 210         | 450         | 200         | 512x512x512 | -            | -            | -         | -         | -                | -                        |
| Ex15Sub04   | 390         | 450         | 200         | 512x512x512 | 0.024866     | 0.007898     | 0.000797  | 0.000264  | 3.4385           | $5.4179 \times 10^{-13}$ |
| Ex15Sub05   | 210         | 200         | 438         | 512x512x512 | 0.025917     | 0.011987     | 0.000836  | 0.000326  | 2.6455           | $4.7369 \times 10^{-13}$ |
| Ex15Sub06   | 390         | 200         | 438         | 512x512x512 | 0.023433     | 0.007965     | 0.000850  | 0.000242  | 2.6323           | $6.1786 \times 10^{-13}$ |
| Ex15Sub07   | 210         | 450         | 438         | 512x512x512 | -            | -            | -         | -         | -                | -                        |
| Ex15Sub08   | 390         | 450         | 438         | 512x512x512 | -            | -            | -         | -         | -                | -                        |

$x_{start}$ : Starting point in x-direction in the full sample

$y_{start}$ : Starting point in y-direction in the full sample

$z_{start}$ : Starting point in z-direction in the full sample

$\phi_{tot}$ : Total porosity of the subsample

$\phi_{eff}$ : Effective porosity of the subsample

$S_{tot}$ : Total specific surface of the subsample [ $\mu m^{-1}$ ]

$S_{eff}$ : Effective specific surface of the subsample [ $\mu m^{-1}$ ]

$\tilde{\tau}_h$ : Average hydraulic tortuosity of the subsample

$k_{num}$ : Numerical estimate for the permeability of the subsample [ $m^2$ ]

Table 5: Table presenting all computed parameters for each subsample of full sample 16.

| Sample name | $x_{start}$ | $y_{start}$ | $z_{start}$ | Resolution  | $\phi_{tot}$ | $\phi_{eff}$ | $S_{tot}$ | $S_{eff}$ | $\tilde{\tau}_h$ | $k_{num}$                |
|-------------|-------------|-------------|-------------|-------------|--------------|--------------|-----------|-----------|------------------|--------------------------|
| Ex16Sub01   | 250         | 200         | 200         | 512x512x512 | 0.04444      | 0.035153     | 0.001122  | 0.000877  | 3.1145           | $6.0323 \times 10^{-13}$ |
| Ex16Sub02   | 460         | 200         | 200         | 512x512x512 | 0.047556     | 0.038212     | 0.001159  | 0.000875  | 2.9813           | $1.0871 \times 10^{-13}$ |
| Ex16Sub03   | 250         | 500         | 200         | 512x512x512 | 0.038939     | 0.030048     | 0.001068  | 0.00826   | 3.2202           | $9.1519 \times 10^{-13}$ |
| Ex16Sub04   | 460         | 500         | 200         | 512x512x512 | 0.048469     | 0.043199     | 0.001210  | 0.001048  | 2.9144           | $1.6762 \times 10^{-12}$ |
| Ex16Sub05   | 250         | 200         | 338         | 512x512x512 | 0.044808     | 0.039079     | 0.001031  | 0.000857  | 3.0482           | $4.5359 \times 10^{-13}$ |
| Ex16Sub06   | 460         | 200         | 338         | 512x512x512 | 0.045129     | 0.037607     | 0.001088  | 0.000867  | 3.1044           | $8.8232 \times 10^{-13}$ |
| Ex16Sub07   | 250         | 500         | 338         | 512x512x512 | 0.036912     | 0.02939      | 0.001005  | 0.0000793 | 3.0625           | $8.6359 \times 10^{-13}$ |
| Ex16Sub08   | 460         | 500         | 338         | 512x512x512 | 0.044741     | 0.03507      | 0.001138  | 0.00883   | 2.8814           | $1.0756 \times 10^{-12}$ |

$x_{start}$ : Starting point in x-direction in the full sample

$y_{start}$ : Starting point in y-direction in the full sample

$z_{start}$ : Starting point in z-direction in the full sample

$\phi_{tot}$ : Total porosity of the subsample

$\phi_{eff}$ : Effective porosity of the subsample

$S_{tot}$ : Total specific surface of the subsample [ $\mu m^{-1}$ ]

$S_{eff}$ : Effective specific surface of the subsample [ $\mu m^{-1}$ ]

$\tilde{\tau}_h$ : Average hydraulic tortuosity of the subsample

$k_{num}$ : Numerical estimate for the permeability of the subsample [ $m^2$ ]

Table 6: Table presenting all computed parameters for each subsample of full sample 17.

| Sample name | $x_{start}$ | $y_{start}$ | $z_{start}$ | Resolution               | $\phi_{tot}$ | $\phi_{eff}$ | $S_{tot}$ | $S_{eff}$ | $\tilde{\tau}_h$ | $k_{num}$                |
|-------------|-------------|-------------|-------------|--------------------------|--------------|--------------|-----------|-----------|------------------|--------------------------|
| Ex17Sub01   | 220         | 190         | 130         | 512x512x384 <sup>a</sup> | 0.1290       | 0.128185     | 0.001997  | 0.001972  | 3.3537           | $3.3763 \times 10^{-11}$ |
| Ex17Sub02   | 460         | 190         | 130         | 512x512x384 <sup>a</sup> | 0.131047     | 0.13049      | 0.002044  | 0.002025  | 3.2969           | $2.5265 \times 10^{-11}$ |
| Ex17Sub03   | 220         | 490         | 130         | 512x512x384 <sup>a</sup> | 0.123565     | 0.123132     | 0.001996  | 0.001982  | 3.3160           | $3.2781 \times 10^{-11}$ |
| Ex17Sub04   | 460         | 490         | 130         | 512x512x384 <sup>a</sup> | 0.125292     | 0.12505      | 0.001990  | 0.001979  | 3.1973           | $2.4791 \times 10^{-11}$ |
| Ex17Sub05   | 220         | 190         | 196         | 512x512x384 <sup>a</sup> | 0.133309     | 0.132519     | 0.002042  | 0.002025  | 3.1319           | $4.2441 \times 10^{-11}$ |
| Ex17Sub06   | 460         | 190         | 196         | 512x512x384 <sup>a</sup> | 0.138704     | 0.138543     | 0.002081  | 0.002071  | 3.2603           | $3.5374 \times 10^{-11}$ |
| Ex17Sub07   | 220         | 490         | 196         | 512x512x384 <sup>a</sup> | 0.12386      | 0.123625     | 0.002013  | 0.002005  | 3.2825           | $3.0172 \times 10^{-11}$ |
| Ex17Sub08   | 460         | 490         | 196         | 512x512x384 <sup>a</sup> | 0.127575     | 0.127238     | 0.002012  | 0.002003  | 3.1150           | $2.7717 \times 10^{-11}$ |

$x_{start}$ : Starting point in x-direction in the full sample

$y_{start}$ : Starting point in y-direction in the full sample

$z_{start}$ : Starting point in z-direction in the full sample

$\phi_{tot}$ : Total porosity of the subsample

$\phi_{eff}$ : Effective porosity of the subsample

$S_{tot}$ : Total specific surface of the subsample [ $\mu m^{-1}$ ]

$S_{eff}$ : Effective specific surface of the subsample [ $\mu m^{-1}$ ]

$\tilde{\tau}_h$ : Average hydraulic tortuosity of the subsample

$k_{num}$ : Numerical estimate for the permeability of the subsample [ $m^2$ ]

<sup>a</sup>It should be noted that the employed micro-CT scanner only provides a fixed amount of pixels in the vertical direction, thus for larger samples the resolution in vertical direction decreases. For this reason the resolution in z-direction of sample 17 is restricted to 384 pixels.

Table 7: Table presenting all computed parameters for each subsample of full sample 29.

| Sample name | $x_{start}$ | $y_{start}$ | $z_{start}$ | Resolution  | $\phi_{tot}$ | $\phi_{eff}$ | $S_{tot}$ | $S_{eff}$ | $\tilde{\tau}_h$ | $k_{num}$                |
|-------------|-------------|-------------|-------------|-------------|--------------|--------------|-----------|-----------|------------------|--------------------------|
| Ex29Sub01   | 250         | 270         | 300         | 512x512x512 | 0.079443     | 0.079136     | 0.001746  | 0.001726  | 3.0436           | $6.9842 \times 10^{-12}$ |
| Ex29Sub02   | 550         | 270         | 300         | 512x512x512 | 0.094175     | 0.091719     | 0.001863  | 0.001831  | 2.7007           | $1.500 \times 10^{-11}$  |
| Ex29Sub03   | 250         | 560         | 300         | 512x512x512 | 0.097119     | 0.096135     | 0.001830  | 0.001806  | 2.9604           | $2.3861 \times 10^{-12}$ |
| Ex29Sub04   | 550         | 560         | 300         | 512x512x512 | 0.084301     | 0.083867     | 0.001732  | 0.001714  | 2.7236           | $4.9509 \times 10^{-12}$ |
| Ex29Sub05   | 250         | 270         | 688         | 512x512x512 | 0.0101234    | 0.101158     | 0.001734  | 0.001728  | 2.9145           | $6.1631 \times 10^{-12}$ |
| Ex29Sub06   | 550         | 270         | 688         | 512x512x512 | 0.095257     | 0.095225     | 0.001813  | 0.001808  | 2.9061           | $3.9683 \times 10^{-12}$ |
| Ex29Sub07   | 250         | 560         | 688         | 512x512x512 | 0.139354     | 0.139344     | 0.002002  | 0.002001  | 2.9462           | $4.3762 \times 10^{-11}$ |
| Ex29Sub08   | 550         | 560         | 688         | 512x512x512 | 0.108302     | 0.108272     | 0.001898  | 0.001894  | 3.1530           | $7.4544 \times 10^{-12}$ |

$x_{start}$ : Starting point in x-direction in the full sample

$y_{start}$ : Starting point in y-direction in the full sample

$z_{start}$ : Starting point in z-direction in the full sample

$\phi_{tot}$ : Total porosity of the subsample

$\phi_{eff}$ : Effective porosity of the subsample

$S_{tot}$ : Total specific surface of the subsample [ $\mu m^{-1}$ ]

$S_{eff}$ : Effective specific surface of the subsample [ $\mu m^{-1}$ ]

$\tilde{\tau}_h$ : Average hydraulic tortuosity of the subsample

$k_{num}$ : Numerical estimate for the permeability of the subsample [ $m^2$ ]

Table 8: Table presenting all computed parameters for each subsample of full sample 30.

| Sample name | $x_{start}$ | $y_{start}$ | $z_{start}$ | Resolution  | $\phi_{tot}$ | $\phi_{eff}$ | $S_{tot}$ | $S_{eff}$ | $\tilde{\tau}_h$ | $k_{num}$                |
|-------------|-------------|-------------|-------------|-------------|--------------|--------------|-----------|-----------|------------------|--------------------------|
| Ex30Sub01   | 300         | 270         | 220         | 512x512x512 | 0.081708     | 0.081016     | 0.001643  | 0.001643  | 2.8136           | $1.7547 \times 10^{-11}$ |
| Ex30Sub02   | 570         | 270         | 220         | 512x512x512 | 0.061623     | 0.060453     | 0.001480  | 0.001411  | 2.9487           | $7.0034 \times 10^{-12}$ |
| Ex30Sub03   | 300         | 620         | 220         | 512x512x512 | 0.078211     | 0.077074     | 0.001632  | 0.001586  | 3.1405           | $7.8634 \times 10^{-12}$ |
| Ex30Sub04   | 570         | 620         | 220         | 512x512x512 | 0.052056     | 0.049618     | 0.001420  | 0.001321  | 2.3078           | $9.1998 \times 10^{-13}$ |
| Ex30Sub05   | 300         | 270         | 588         | 512x512x512 | 0.080040     | 0.079915     | 0.001656  | 0.001646  | 3.0186           | $7.8493 \times 10^{-12}$ |
| Ex30Sub06   | 570         | 270         | 588         | 512x512x512 | 0.064841     | 0.063569     | 0.001474  | 0.001426  | 3.0924           | $6.0615 \times 10^{-12}$ |
| Ex30Sub07   | 300         | 620         | 588         | 512x512x512 | 0.075901     | 0.075296     | 0.001600  | 0.001566  | 2.9057           | $7.6428 \times 10^{-12}$ |
| Ex30Sub08   | 570         | 620         | 588         | 512x512x512 | 0.075952     | 0.075502     | 0.001545  | 0.001518  | 3.5890           | $5.4412 \times 10^{-12}$ |

$x_{start}$ : Starting point in x-direction in the full sample

$y_{start}$ : Starting point in y-direction in the full sample

$z_{start}$ : Starting point in z-direction in the full sample

$\phi_{tot}$ : Total porosity of the subsample

$\phi_{eff}$ : Effective porosity of the subsample

$S_{tot}$ : Total specific surface of the subsample [ $\mu m^{-1}$ ]

$S_{eff}$ : Effective specific surface of the subsample [ $\mu m^{-1}$ ]

$\tilde{\tau}_h$ : Average hydraulic tortuosity of the subsample

$k_{num}$ : Numerical estimate for the permeability of the subsample [ $m^2$ ]



Table 9: Table presenting all computed parameters for each subsample of full sample 31. Empty cells denote a simulation which did not converge.

| Sample name | $x_{start}$ | $y_{start}$ | $z_{start}$ | Resolution  | $\phi_{tot}$ | $\phi_{eff}$ | $S_{tot}$ | $S_{eff}$ | $\tilde{\tau}_h$ | $k_{num}$                |
|-------------|-------------|-------------|-------------|-------------|--------------|--------------|-----------|-----------|------------------|--------------------------|
| Ex31Sub01   | 300         | 200         | 300         | 512x512x512 | 0.083755     | 0.080562     | 0.001589  | 0.001494  | 3.9590           | $3.7192 \times 10^{-12}$ |
| Ex31Sub02   | 570         | 200         | 300         | 512x512x512 | 0.112373     | 0.111034     | 0.001696  | 0.001650  | 2.3322           | $1.6933 \times 10^{-10}$ |
| Ex31Sub03   | 300         | 580         | 300         | 512x512x512 | 0.094594     | 0.094583     | 0.001737  | 0.001734  | -                | -                        |
| Ex31Sub04   | 570         | 580         | 300         | 512x512x512 | 0.097983     | 0.097562     | 0.001777  | 0.001756  | 3.1126           | $6.7461 \times 10^{-12}$ |
| Ex31Sub05   | 300         | 200         | 585         | 512x512x512 | 0.102019     | 0.101986     | 0.001814  | 0.001808  | 3.3335           | $1.0271 \times 10^{-11}$ |
| Ex31Sub06   | 570         | 200         | 585         | 512x512x512 | 0.116349     | 0.116260     | 0.001781  | 0.001770  | 3.3330           | $1.1042 \times 10^{-10}$ |
| Ex31Sub07   | 300         | 580         | 585         | 512x512x512 | 0.093658     | 0.093150     | 0.001813  | 0.001799  | 2.9759           | $6.7769 \times 10^{-12}$ |
| Ex31Sub08   | 570         | 580         | 585         | 512x512x512 | 0.095722     | 0.095647     | 0.001842  | 0.001833  | 3.0146           | $5.2386 \times 10^{-12}$ |

$x_{start}$ : Starting point in x-direction in the full sample

$y_{start}$ : Starting point in y-direction in the full sample

$z_{start}$ : Starting point in z-direction in the full sample

$\phi_{tot}$ : Total porosity of the subsample

$\phi_{eff}$ : Effective porosity of the subsample

$S_{tot}$ : Total specific surface of the subsample [ $\mu m^{-1}$ ]

$S_{eff}$ : Effective specific surface of the subsample [ $\mu m^{-1}$ ]

$\tilde{\tau}_h$ : Average hydraulic tortuosity of the subsample

$k_{num}$ : Numerical estimate for the permeability of the subsample [ $m^2$ ]

Table 10: Table presenting all computed parameters for each subsample of full sample 32. Empty cells denote a simulation which did not converge.

| Sample name | $x_{start}$ | $y_{start}$ | $z_{start}$ | Resolution  | $\phi_{tot}$ | $\phi_{eff}$ | $S_{tot}$ | $S_{eff}$ | $\tilde{\tau}_h$ | $k_{num}$                |
|-------------|-------------|-------------|-------------|-------------|--------------|--------------|-----------|-----------|------------------|--------------------------|
| Ex32Sub01   | 260         | 200         | 300         | 512x512x512 | 0.14897      | 0.148925     | 0.002311  | 0.002307  | 2.9500           | $5.7975 \times 10^{-11}$ |
| Ex32Sub02   | 480         | 200         | 300         | 512x512x512 | 0.139209     | 0.139177     | 0.002183  | 0.002180  | 2.7449           | $6.6573 \times 10^{-11}$ |
| Ex32Sub03   | 260         | 580         | 300         | 512x512x512 | 0.108525     | 0.108454     | 0.001954  | 0.001946  | 3.0370           | $2.9841 \times 10^{-11}$ |
| Ex32Sub04   | 480         | 580         | 300         | 512x512x512 | 0.126154     | 0.126113     | 0.002051  | 0.002047  | 3.0112           | $5.3088 \times 10^{-11}$ |
| Ex32Sub05   | 260         | 200         | 688         | 512x512x512 | 0.15043      | 0.150423     | 0.002209  | 0.002208  | -                | -                        |
| Ex32Sub06   | 480         | 200         | 688         | 512x512x512 | 0.153428     | 0.153424     | 0.002277  | 0.002276  | 2.7845           | $1.0090 \times 10^{-10}$ |
| Ex32Sub07   | 260         | 580         | 688         | 512x512x512 | 0.121058     | 0.120886     | 0.001923  | 0.001912  | 2.9216           | $1.1587 \times 10^{-11}$ |
| Ex32Sub08   | 480         | 580         | 688         | 512x512x512 | 0.13975      | 0.139708     | 0.002132  | 0.002127  | 2.8426           | $7.9489 \times 10^{-11}$ |

$x_{start}$ : Starting point in x-direction in the full sample

$y_{start}$ : Starting point in y-direction in the full sample

$z_{start}$ : Starting point in z-direction in the full sample

$\phi_{tot}$ : Total porosity of the subsample

$\phi_{eff}$ : Effective porosity of the subsample

$S_{tot}$ : Total specific surface of the subsample [ $\mu m^{-1}$ ]

$S_{eff}$ : Effective specific surface of the subsample [ $\mu m^{-1}$ ]

$\tilde{\tau}_h$ : Average hydraulic tortuosity of the subsample

$k_{num}$ : Numerical estimate for the permeability of the subsample [ $m^2$ ]

Table 11: Table presenting all computed parameters for each subsample of full sample 33.

| Sample name | $x_{start}$ | $y_{start}$ | $z_{start}$ | Resolution  | $\phi_{tot}$ | $\phi_{eff}$ | $S_{tot}$ | $S_{eff}$ | $\tilde{\tau}_h$ | $k_{num}$                |
|-------------|-------------|-------------|-------------|-------------|--------------|--------------|-----------|-----------|------------------|--------------------------|
| Ex33Sub01   | 250         | 200         | 300         | 512x512x512 | 0.142643     | 0.14262      | 0.002280  | 0.002277  | 2.9375           | $6.4878 \times 10^{-11}$ |
| Ex33Sub02   | 500         | 200         | 300         | 512x512x512 | 0.15276      | 0.15275      | 0.002372  | 0.002370  | 2.7040           | $1.1327 \times 10^{-10}$ |
| Ex33Sub03   | 250         | 620         | 300         | 512x512x512 | 0.168557     | 0.16850      | 0.002375  | 0.002370  | 2.8905           | $1.0842 \times 10^{-10}$ |
| Ex33Sub04   | 500         | 620         | 300         | 512x512x512 | 0.148534     | 0.14809      | 0.002285  | 0.002274  | 2.7569           | $4.8053 \times 10^{-11}$ |
| Ex33Sub05   | 250         | 200         | 688         | 512x512x512 | 0.166676     | 0.16642      | 0.002194  | 0.002186  | 2.6611           | $1.5603 \times 10^{-10}$ |
| Ex33Sub06   | 500         | 200         | 688         | 512x512x512 | 0.161741     | 0.16171      | 0.002186  | 0.002184  | 2.7634           | $1.3074 \times 10^{-10}$ |
| Ex33Sub07   | 250         | 620         | 688         | 512x512x512 | 0.173051     | 0.17265      | 0.002252  | 0.002243  | 2.9900           | $1.0015 \times 10^{-10}$ |
| Ex33Sub08   | 500         | 620         | 688         | 512x512x512 | 0.164098     | 0.16408      | 0.002197  | 0.002194  | 2.8590           | $9.7772 \times 10^{-11}$ |

$x_{start}$ : Starting point in x-direction in the full sample

$y_{start}$ : Starting point in y-direction in the full sample

$z_{start}$ : Starting point in z-direction in the full sample

$\phi_{tot}$ : Total porosity of the subsample

$\phi_{eff}$ : Effective porosity of the subsample

$S_{tot}$ : Total specific surface of the subsample [ $\mu m^{-1}$ ]

$S_{eff}$ : Effective specific surface of the subsample [ $\mu m^{-1}$ ]

$\tilde{\tau}_h$ : Average hydraulic tortuosity of the subsample

$k_{num}$ : Numerical estimate for the permeability of the subsample [ $m^2$ ]

Table 12: Table presenting all computed parameters for each subsample of full sample 35.

| Sample name | $x_{start}$ | $y_{start}$ | $z_{start}$ | Resolution     | $\phi_{tot}$ | $\phi_{eff}$ | $S_{tot}$ | $S_{eff}$ | $\tilde{\tau}_h$ | $k_{num}$                |
|-------------|-------------|-------------|-------------|----------------|--------------|--------------|-----------|-----------|------------------|--------------------------|
| Ex35Sub01   | 300         | 230         | 300         | 512x512x512    | 0.128539     | 0.12846      | 0.002130  | 0.002123  | 2.8561           | $3.6485 \times 10^{-11}$ |
| Ex35Sub02   | 620         | 230         | 300         | 512x512x512    | 0.141053     | 0.14103      | 0.002016  | 0.002013  | 2.8673           | $5.2640 \times 10^{-10}$ |
| Ex35Sub03   | 300         | 600         | 300         | 512x512x512    | 0.130561     | 0.13053      | 0.002168  | 0.002164  | 3.0336           | $5.4220 \times 10^{-11}$ |
| Ex35Sub04   | 620         | 600         | 300         | 512x512x512    | 0.158124     | 0.15811      | 0.002252  | 0.002249  | 3.0041           | $8.3366 \times 10^{-11}$ |
| Ex35Sub04   | 620         | 600         | 300         | 1024x1024x1024 | 0.158124     | 0.15811      | 0.002252  | 0.002249  | 3.0041           | $8.1811 \times 10^{-11}$ |
| Ex35Sub05   | 300         | 230         | 688         | 512x512x512    | 0.125034     | 0.12390      | 0.002057  | 0.002027  | 2.9775           | $2.3044 \times 10^{-11}$ |
| Ex35Sub06   | 620         | 230         | 688         | 512x512x512    | 0.148442     | 0.14842      | 0.002095  | 0.002091  | 2.9155           | $3.8459 \times 10^{-11}$ |
| Ex35Sub07   | 300         | 600         | 688         | 512x512x512    | 0.151153     | 0.15098      | 0.002146  | 0.002139  | 2.7789           | $8.9612 \times 10^{-11}$ |
| Ex35Sub08   | 620         | 600         | 688         | 512x512x512    | 0.150795     | 0.15066      | 0.002102  | 0.002096  | 2.7790           | $8.8771 \times 10^{-11}$ |

$x_{start}$ : Starting point in x-direction in the full sample

$y_{start}$ : Starting point in y-direction in the full sample

$z_{start}$ : Starting point in z-direction in the full sample

$\phi_{tot}$ : Total porosity of the subsample

$\phi_{eff}$ : Effective porosity of the subsample

$S_{tot}$ : Total specific surface of the subsample [ $\mu m^{-1}$ ]

$S_{eff}$ : Effective specific surface of the subsample [ $\mu m^{-1}$ ]

$\tilde{\tau}_h$ : Average hydraulic tortuosity of the subsample

$k_{num}$ : Numerical estimate for the permeability of the subsample [ $m^2$ ]

Table 13: Table presenting all computed parameters for each subsample of full sample 36.

| Sample name | $x_{start}$ | $y_{start}$ | $z_{start}$ | Resolution     | $\phi_{tot}$ | $\phi_{eff}$ | $S_{tot}$ | $S_{eff}$ | $\tilde{\tau}_h$ | $k_{num}$                |
|-------------|-------------|-------------|-------------|----------------|--------------|--------------|-----------|-----------|------------------|--------------------------|
| Ex36Sub01   | 270         | 280         | 300         | 512x512x512    | 0.114534     | 0.11375      | 0.001944  | 0.001924  | 3.0055           | $1.7302 \times 10^{-11}$ |
| Ex36Sub02   | 600         | 280         | 300         | 512x512x512    | 0.096502     | 0.09645      | 0.001954  | 0.001947  | 2.9384           | $1.4803 \times 10^{-11}$ |
| Ex36Sub02   | 600         | 280         | 300         | 1024x1024x1024 | 0.096502     | 0.09645      | 0.001954  | 0.001947  | 2.9384           | $1.4227 \times 10^{-11}$ |
| Ex36Sub03   | 270         | 600         | 300         | 512x512x512    | 0.118101     | 0.11803      | 0.001933  | 0.001926  | 2.9195           | $4.6326 \times 10^{-11}$ |
| Ex36Sub04   | 600         | 600         | 300         | 512x512x512    | 0.107842     | 0.10777      | 0.001922  | 0.001914  | 2.8096           | $1.8616 \times 10^{-11}$ |
| Ex36Sub05   | 270         | 280         | 588         | 512x512x512    | 0.111694     | 0.11026      | 0.001890  | 0.001842  | 3.1584           | $1.3812 \times 10^{-11}$ |
| Ex36Sub06   | 600         | 280         | 588         | 512x512x512    | 0.089328     | 0.08929      | 0.001851  | 0.001845  | 2.9481           | $1.6967 \times 10^{-11}$ |
| Ex36Sub07   | 270         | 600         | 588         | 512x512x512    | 0.115202     | 0.11509      | 0.001956  | 0.001948  | 3.0272           | $2.2184 \times 10^{-11}$ |
| Ex36Sub08   | 600         | 600         | 588         | 512x512x512    | 0.103681     | 0.10360      | 0.001956  | 0.001949  | 3.2698           | $1.6661 \times 10^{-11}$ |

$x_{start}$ : Starting point in x-direction in the full sample

$y_{start}$ : Starting point in y-direction in the full sample

$z_{start}$ : Starting point in z-direction in the full sample

$\phi_{tot}$ : Total porosity of the subsample

$\phi_{eff}$ : Effective porosity of the subsample

$S_{tot}$ : Total specific surface of the subsample [ $\mu m^{-1}$ ]

$S_{eff}$ : Effective specific surface of the subsample [ $\mu m^{-1}$ ]

$\tilde{\tau}_h$ : Average hydraulic tortuosity of the subsample

$k_{num}$ : Numerical estimate for the permeability of the subsample [ $m^2$ ]
